# Supplementary material
Source: PubMed Central journal article supplement (PMC4605353)
Supplement: Supp_Table1.pdf [file Supp_Table1.pdf]

## Supplementary Data

SUPPLEMENTARY TABLE S1. LIST OF PRIMER SEQUENCES USED FOR PCR EXPERIMENTS

| <i>Gene</i> | <i>RefSeqID</i> | <i>Forward seq (5'-3')</i> | <i>Reverse seq (5'-3')</i> |
|-------------|-----------------|----------------------------|----------------------------|
| 18S rRNA    | NM_003286       | CCGCAGCTAGGAATAATGGA       | CCCTCTTAATCATGGCCTCA       |
| OCT4        | NM_002701       | GTACTCCTCGGTCCCTTTCC       | AGTTTGTGCCAGGGTTTTTG       |
| NANOG       | NM_024865       | CTCCATGAACATGCAACCTG       | GTTGGAGCCTAATCAGCGAG       |
| B2M-B       | NM_004048       | ACTGAATTCACCCCACTGA        | CCTCCATGATGCTGCTTACA       |
| B2M-H       | NM_004048       | TGCTGTCTCCATGTTTGATGTATCT  | TCTCTGCTCCCCACCTCTAAGT     |
| CD80        | NM_005191       | CAACCAAGCAAGAGCATTTT       | GCTTCTGCGGACACTGTTAT       |
| CD81        | NM_004356       | AGCAACATCATCAGCAACCTCTTC   | TCTCGAAGATCATGATCACAGCGA   |
| CD83        | NM_004233       | ATTCCCTGAAGATCCGAAAC       | GAAAATAACCAGAGCCAGCA       |
| CD86        | NM_175862       | TGAGAGAGGAAGAGCTGCAA       | GTTGCCTTGAGCAAAAACAA       |
| FASL        | NM_000639       | GCACTTTGGGATTCTTTCCA       | CCTCCATTTGTCTGGCTCAT       |
| FAS         | NM_000043       | TCAGTACGGAGTTGGGGAAG       | CAGGCCTTCCAAGTTCTGAG       |
| TBP         | NM_003194       | TATAATCCCAAGCGGTTTGC       | GCTGGAAAACCAACTTCTG        |
| GATA4       | NM_002052       | CCCAATCTCGATATGTTTGACGAC   | GATGCCGTTTCATCTTGTGGTAGAG  |
| TBX5        | NM_000192       | TGCGTTTATAGCAGTGACTTCCTA   | TTTGCATTCTTGACATTCTGTGCA   |
| Nkx2-5      | NM_004387       | GCACCCACCCGTATTTATGTTTTT   | GGGTCAACGCACTCTTTTAATG     |
| ACTC        | NM_005159       | CTGGCATCCATGAAACAACCTTACA  | CCTTCTGCATACGATCAGCAATAC   |
| ACTN2       | NM_001103       | GATGAAAGAGCCATCATGACGTAC   | AGCCTCTCATTCTCTTGATTCACA   |
| aMYH6       | NM_002471       | GAGAAGGAGAAGAGCGAGTTCAAG   | GAGACACTTTCTCCAGGTTTGC     |

PCR, polymerase chain reaction.
